# Supplementary material for: Long-Term Sequelae of Frostbite—A Scoping Review
Source: MDPI journal article supplement (doi:10.3390/ijerph18189655), 2021-09-14
Supplement: s1 [file s1]

**Table S1:** Case reports and case series about frostbite long-term sequelae. Grades of frostbite are not specified except in Irsay et al., 2019 [51] as grade 3

| Article                    | Age     | Sex    | Location of injury  | Years since frostbite   | Signs and symptoms                                                                                                         | Treatment and Outcome                                        |
|----------------------------|---------|--------|---------------------|-------------------------|----------------------------------------------------------------------------------------------------------------------------|--------------------------------------------------------------|
| Irsay et al., 2019 [51]    | 35      | Male   | Both hands          | 17                      | Functional impairment, hyperalgia, histopathological alterations of cartilage                                              | Not specified                                                |
| Norheim et al., 2017 [45]  | 24      | Male   | Both hands          | 2                       | Cold intolerance, loss of sensation, pain                                                                                  | Not specified                                                |
| Wang et al., 2016 [52]     | 35      | Male   | Both hands          | 17                      | Stiffness and weakness in hands, enlargement of the interphalangeal joints, shortening of digits                           | Not specified                                                |
| Kahn et al., 2005 [53]     | 46      | Female | Both hands          | 22                      | Deformations and pain in the interphalangeal joints                                                                        | Clodronic acid 800 mg 2x / d leading to clinical improvement |
| Pettit et al., 1998 [54]   | 29      | Male   | Both hands          | Injury during childhood | Pain, swelling decreased range of motion in the interphalangeal joints                                                     | Paracetamol and naproxen led to clinical improvement         |
| Turner et al., 1998 [55]   | 36      | Male   | Right hand          | 14                      | Swelling and reduced flexion in the interphalangeal joints                                                                 | Not specified                                                |
| Crouch et al., 1990 [56]   | 14      | Male   | Both hands and feet | 13                      | Limited motion of hands and feet, deformity of fingers and toes                                                            | Not specified                                                |
| Leung et al., 1985 [57]    | 9       | Male   | Both hands          | 5                       | Deformity and ulnar deviation of fingers                                                                                   | Not specified                                                |
| Nakazato et al., 1985 [58] | 4       | Female | Both hands          | 2                       | Enlarged interphalangeal joints, radial deviation, and flexion deformity of fingers                                        | Not specified                                                |
| Rossis et al., 1982 [59]   | 52 - 62 | 10 Men | Heel                | 29-38                   | Squamous cell carcinoma                                                                                                    | Surgical excision                                            |
| Carrera et al., 1981 [60]  | 16      | Female | Both hands          | 14                      | Finger deformities and stiffness of the interphalangeal joints                                                             | Not specified                                                |
| McKendry et al., 1981 [61] | 29      | Male   | Both hands          | 15                      | Swelling and stiffness of the proximal interphalangeal joints, flexion deformity of the distal phalanges, cold intolerance | Not specified                                                |

|                               |    |        |            |    |                                                                          |               |
|-------------------------------|----|--------|------------|----|--------------------------------------------------------------------------|---------------|
| Solomon et al., 1980 [62]     | 22 | Female | Both hands | 20 | Pain and swelling in interphalangeal joints                              | Not specified |
| Carrera et al., 1979 [63]     | 14 | Male   | Both hands | 1  | Swollen interphalangeal joints with morning stiffness                    | Not specified |
| Carrera et al., 1979 [63]     | 25 | Male   | Left hand  | 5  | Flexion deformities and crepitation in the distal interphalangeal joints | Not specified |
| Ellis et al. 1969 [64]        | 44 | Female | Left hand  | 27 | Swelling of the distal interphalangeal joints                            | Not specified |
| Selke et al., 1969 [65]       | 9  | Female | Both hands | 6  | Pain                                                                     | Not specified |
| Lindholm et al., 1968 [66]    | 6  | Male   | Both hands | 3  | Radial deviation of fingers, cold intolerance                            | Not specified |
| Lindholm et al., 1968 [66]    | 12 | Male   | Both hands | 8  | Deformity of fingers                                                     | Not specified |
| Lindholm et al., 1968 [66]    | 21 | Female | Both hands | 18 | Deformity of fingers                                                     | Not specified |
| Wenzl et al., 1967 [67]       | 10 | Male   | Both hands | 1  | Swelling of interphalangeal joints with flexion deformity                | Not specified |
| Bigelow et al., 1963 [68]     | 58 | Male   | Both hands | 50 | Shortening and deformity of fingers                                      | Not specified |
| Bigelow et al., 1963 [68]     | 51 | Female | Right hand | 48 | Deformity and extension weakness of fingers, cold intolerance            | Not specified |
| Bigelow et al., 1963 [68]     | 12 | Female | Both hands | 12 | Finger deformities, impaired flexion or extension in different joints    | Not specified |
| Bigelow et al., 1963 [68]     | 11 | Male   | Both hands | 9  | Deformity of fingers, cold intolerance                                   | Not specified |
| Bigelow et al., 1963 [68]     | 37 | Female | Left hand  | 34 | Deformity of fingers, hyperalgesia                                       | Not specified |
| Bigelow et al., 1963 [68]     | 13 | Female | Right hand | 12 | Deformity of hand, muscular weakness                                     | Not specified |
| Florkiewicz et al., 1961 [69] | 5  | Male   | Both hands | 3  | Deformity of fingers                                                     | Not specified |
| Dreyfuss et al., 1955 [70]    | 7  | Female | Both hands | 5  | Deformity of fingers                                                     | Not specified |
| Thelander 1950 [71]           | 9  | Male   | Right hand | 2  | Pain and swelling in the interphalangeal joints                          | Not specified |

|                             |   |        |           |             |                                                                                   |                                                                 |
|-----------------------------|---|--------|-----------|-------------|-----------------------------------------------------------------------------------|-----------------------------------------------------------------|
| Bennet et al.,<br>1935 [72] | 8 | Female | Left hand | 7<br>months | Swelling and limitaion of<br>motion of the proximal<br>interphalangelal<br>joints | Temporary<br>splinting of<br>fingers did not<br>improve outcome |
|-----------------------------|---|--------|-----------|-------------|-----------------------------------------------------------------------------------|-----------------------------------------------------------------|
